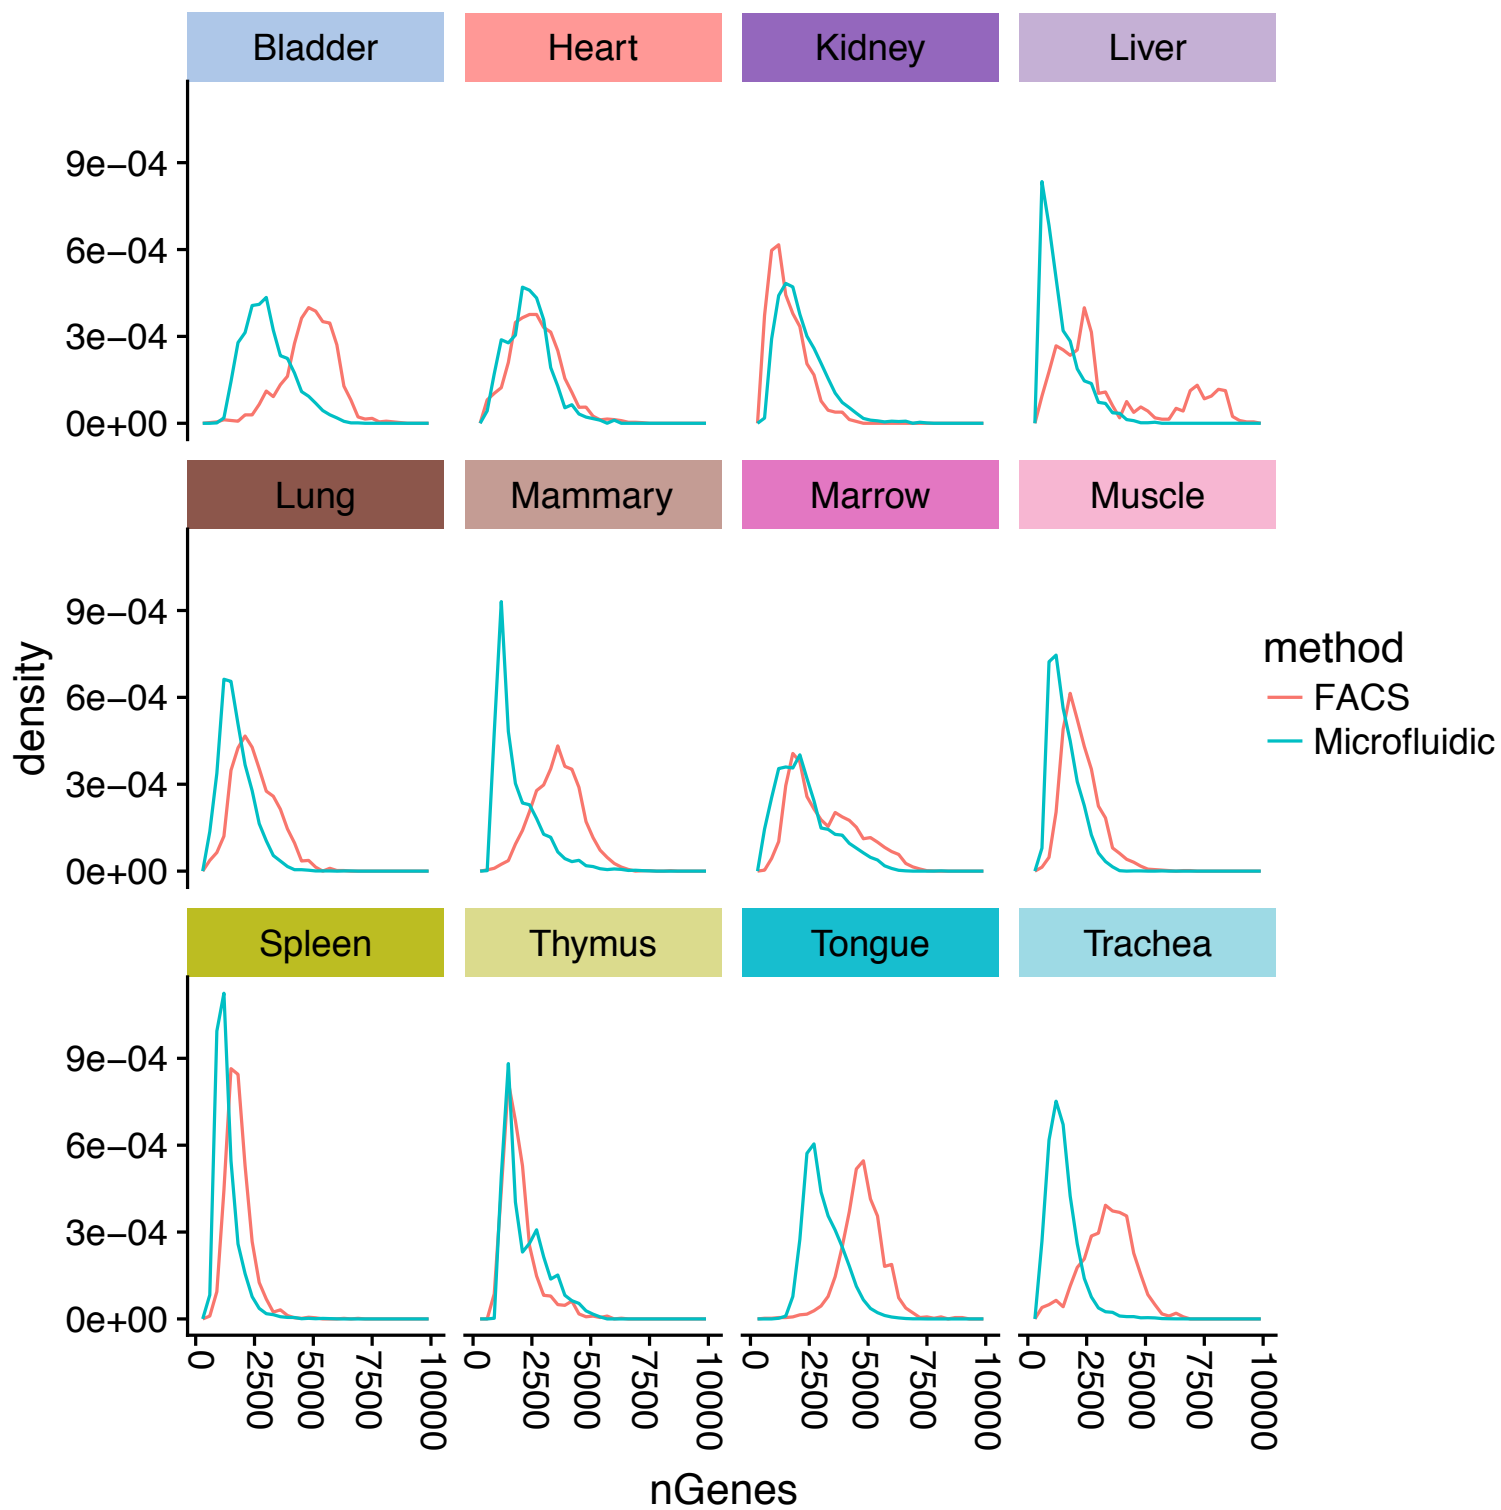

Supplementary Figure 1.
